# Supplementary material for: Efficacy and Safety of a Biosimilar Versus Branded Enoxaparin in the Prevention of Venous Thromboembolism Following Major Abdominal Surgery: A Randomized, Prospective, Single-Blinded, Multicenter Clinical Trial
Source: PubMed Central journal article supplement — Clin Appl Thromb Hemost. 2018 Jul 18;24(8):1208–15. doi: 10.1177/1076029618786583 (PMC6714771; doi:10.1177/1076029618786583), 2018-07-18
Supplement: Supplemental_Material_Study_Sites.pdf [file Supplemental_Material_Study_Sites.pdf]

## Supplemental Material. Study Sites

| <b>Study Sites (institution)</b>                               | <b>Principal Investigator</b>    | <b>City/State</b>        |
|----------------------------------------------------------------|----------------------------------|--------------------------|
| Hospital Regional da Asa Norte Brasília (HRAN)                 | Dr. Gilson Roberto de Araújo     | Brasília/DF              |
| CEMEC- Hospital Anchieta                                       | Dr. João Correa                  | São Bernardo do Campo/SP |
| Hospital Estadual Mário Covas                                  | Dr. Agenor Vasconcelos Costa     | Santo André/SP           |
| UNICAMP                                                        | Dr. Ubirajara Ferreira           | Campinas/SP              |
| Hospital de Base                                               | Dra. Selma Raymundo              | São José do Rio Preto/SP |
| Hüning Instituto de Oftalmologia e Pesquisa Ltda ME. HIOP/HRPC | Dr. Guido Bernardo Aranha Rosito | Canos/RS                 |
| Hospital de Clínicas de Porto Alegre                           | Dr. Alessandro Bersch Osvaldt    | Porto Alegre/RS          |
| Pontifícia Universidade Católica do Rio Grande do Sul          | Dr Salvador Gullo Neto           | Porto Alegre/RS          |
| Hospital e Maternidade Dr Cristóvão da Gama                    | Dr Eduardo Ramacciotti           | Santo André/SP           |
